# Supplementary material for: Susceptibility Genes for Multiple Sclerosis Identified in a Gene-Based Genome-Wide Association Study
Source: PubMed Central journal article supplement — J Clin Neurol. 2015 Aug 21;11(4):311–8. doi: 10.3988/jcn.2015.11.4.311 (PMC4596110; doi:10.3988/jcn.2015.11.4.311), 2015-08-21
Supplement: jcn-11-311-s001.pdf [file jcn-11-311-s001.pdf]

**Supplementary Table 1.** Results of gene-based and differential expression analyses of 58 MS-associated genes

| Gene                                  | Chromosome | Start position | Length | #SNP* | Initial $p$            | Genes significant in initial study based on SNP-based $p$ | Genes in PheGenl | Replication $p$       | Differential expression $p$ | Sample <sup>†</sup> |
|---------------------------------------|------------|----------------|--------|-------|------------------------|-----------------------------------------------------------|------------------|-----------------------|-----------------------------|---------------------|
| <i>C6orf10</i>                        | 6          | 32255475       | 89181  | 21    | $3.97 \times 10^{-39}$ | <i>C6orf10</i>                                            | <i>C6orf10</i>   | $3.16 \times 10^{-3}$ | NS                          | NS                  |
| <i>NOTCH4</i>                         | 6          | 32157620       | 39224  | 7     | $2.51 \times 10^{-31}$ | <i>NOTCH4</i>                                             | <i>NOTCH4</i>    | NS                    | NS                          | NS                  |
| <i>TNXB</i>                           | 6          | 32003932       | 78221  | 2     | $6.61 \times 10^{-28}$ | <i>TNXB</i>                                               | <i>TNXB</i>      | $3.37 \times 10^{-3}$ | $4.45 \times 10^{-2}$       | S2                  |
| <i>HLA-DRA</i>                        | 6          | 32402619       | 15204  | 9     | $3.73 \times 10^{-24}$ | <i>HLA-DRA</i>                                            | <i>HLA-DRA</i>   | $4.08 \times 10^{-3}$ | $5.82 \times 10^{-5}$       | S1                  |
| <i>AIF1</i>                           | 6          | 31577994       | 11804  | 1     | $3.15 \times 10^{-23}$ | <i>AIF1</i>                                               | <i>AIF1</i>      | NA                    | $2.04 \times 10^{-2}$       | S1                  |
| <i>SNORA38</i>                        | 6          | 31585856       | 10131  | 1     | $3.15 \times 10^{-23}$ | <i>SNORA38</i>                                            | NA               | NA                    | NA                          | NA                  |
| <i>BAT2</i>                           | 6          | 31583450       | 27104  | 3     | $1.18 \times 10^{-22}$ | <i>BAT2</i>                                               | <i>BAT2</i>      | $3.42 \times 10^{-2}$ | NS                          | NS                  |
| <i>BAT3</i>                           | 6          | 31601805       | 23672  | 3     | $4.41 \times 10^{-19}$ | <i>BAT3</i>                                               | <i>BAT3</i>      | $9.52 \times 10^{-3}$ | NS                          | NS                  |
| <i>PPIAP9</i>                         | 6          | 31481654       | 11525  | 1     | $1.46 \times 10^{-15}$ | <i>PPIAP9</i>                                             | <i>PPIAP9</i>    | $4.67 \times 10^{-2}$ | NA                          | NA                  |
| <i>HLA-DQB2</i>                       | 6          | 32718875       | 17455  | 6     | $9.02 \times 10^{-15}$ | <i>HLA-DQB2</i>                                           | <i>HLA-DQB2</i>  | $1.01 \times 10^{-2}$ | NS                          | NS                  |
| <i>HLA-DOA2</i>                       | 6          | 32704163       | 15501  | 6     | $1.25 \times 10^{-14}$ | <i>HLA-DOA2</i>                                           | <i>HLA-DOA2</i>  | $3.93 \times 10^{-3}$ | NS                          | NS                  |
| <i>EHMT2</i>                          | 6          | 31842536       | 27928  | 1     | $8.91 \times 10^{-14}$ | <i>EHMT2</i>                                              | <i>EHMT2</i>     | NS                    | $4.30 \times 10^{-3}$       | S1                  |
|                                       |            |                |        |       |                        |                                                           |                  |                       | $4.50 \times 10^{-2}$       | S2                  |
| <i>LOC100287272</i>                   | 6          | 31238352       | 13179  | 5     | $1.79 \times 10^{-13}$ | <i>LOC100287272</i>                                       | NA               | $4.76 \times 10^{-3}$ | NA                          | NA                  |
| <i>MCCD1</i>                          | 6          | 31491739       | 11269  | 2     | $4.39 \times 10^{-13}$ | <i>MCCD1</i>                                              | <i>MCCD1</i>     | NA                    | NS                          | NS                  |
| <i>LOC100462812</i>                   | 6          | 31340494       | 10311  | 5     | $4.71 \times 10^{-13}$ | <i>LOC100462812</i>                                       | NA               | $8.07 \times 10^{-5}$ | NA                          | NA                  |
| <i>HCG27</i>                          | 6          | 31160537       | 16208  | 3     | $6.34 \times 10^{-13}$ | <i>HCG27</i>                                              | <i>HCG27</i>     | $3.84 \times 10^{-2}$ | NS                          | NS                  |
| <i>HLA-DRB9</i>                       | 6          | 32422597       | 10269  | 6     | $9.42 \times 10^{-13}$ | <i>HLA-DRB9</i>                                           | <i>HLA-DRB9</i>  | $1.60 \times 10^{-3}$ | NA                          | NA                  |
| <i>HLA-S</i>                          | 6          | 31344346       | 10918  | 6     | $4.89 \times 10^{-12}$ | <i>HLA-S</i>                                              | <i>HLA-S</i>     | $3.36 \times 10^{-2}$ | NA                          | NA                  |
| <i>HLA-DOA1</i>                       | 6          | 32600183       | 16246  | 1     | $1.68 \times 10^{-11}$ | <i>HLA-DOA1</i>                                           | <i>HLA-DOA1</i>  | $5.96 \times 10^{-4}$ | $3.51 \times 10^{-2}$       | S1                  |
| <i>TAP2</i>                           | 6          | 32784610       | 26937  | 2     | $8.02 \times 10^{-11}$ | <i>TAP2</i>                                               | <i>TAP2</i>      | NS                    | $3.35 \times 10^{-3}$       | S1                  |
| <i>BTNL2</i>                          | 6          | 32357513       | 22387  | 7     | $1.43 \times 10^{-10}$ | <i>BTNL2</i>                                              | <i>BTNL2</i>     | $8.76 \times 10^{-5}$ | NS                          | NS                  |
| <i>HLA-DOB</i>                        | 6          | 32775540       | 14285  | 4     | $1.78 \times 10^{-10}$ | <i>HLA-DOB</i>                                            | <i>HLA-DOB</i>   | NA                    | $1.63 \times 10^{-5}$       | S1                  |
| <i>RDBP</i>                           | 6          | 31914864       | 17000  | 2     | $4.31 \times 10^{-10}$ | <i>RDBP</i>                                               | <i>RDBP</i>      | $4.16 \times 10^{-2}$ | $2.01 \times 10^{-2}$       | S1                  |
|                                       |            |                |        |       |                        |                                                           |                  |                       | $3.70 \times 10^{-2}$       | S2                  |
| <i>PSORS1C1</i>                       | 6          | 31077608       | 35261  | 10    | $8.59 \times 10^{-10}$ | <i>PSORS1C1</i>                                           | <i>PSORS1C1</i>  | NS                    | $4.85 \times 10^{-2}$       | S2                  |
| <i>HLA-DMB</i>                        | 6          | 32897406       | 16441  | 1     | $2.63 \times 10^{-9}$  | <i>HLA-DMB</i>                                            | <i>HLA-DMB</i>   | NS                    | $4.45 \times 10^{-2}$       | S3                  |
| <i>DHX16</i>                          | 6          | 30615896       | 29934  | 1     | $7.13 \times 10^{-9}$  | <i>DHX16</i>                                              | <i>DHX16</i>     | $2.73 \times 10^{-3}$ | NS                          | NS                  |
| <i>POU5F1</i>                         | 6          | 31127114       | 16337  | 4     | $9.96 \times 10^{-9}$  | <i>POU5F1</i>                                             | <i>POU5F1</i>    | $4.68 \times 10^{-3}$ | $8.28 \times 10^{-3}$       | S2                  |
| <i>TCF19</i>                          | 6          | 31121303       | 15689  | 2     | $2.02 \times 10^{-7}$  | <i>TCF19</i>                                              | <i>TCF19</i>     | $1.78 \times 10^{-2}$ | NS                          | NS                  |
| <i>3.8-1.5 (HLA complex group 26)</i> | 6          | 29727893       | 11180  | 4     | $2.40 \times 10^{-7}$  | <i>3.8-1.5</i>                                            | NA               | $1.27 \times 10^{-3}$ | NA                          | NA                  |
| <i>HLA-F</i>                          | 6          | 29686117       | 13956  | 7     | $4.67 \times 10^{-7}$  | <i>HLA-F</i>                                              | NA               | $1.17 \times 10^{-2}$ | $2.64 \times 10^{-2}$       | S1                  |
| <i>LOC100507436</i>                   | 6          | 31362561       | 76025  | 8     | $4.98 \times 10^{-7}$  | <i>LOC100507436</i>                                       | NA               | NS                    | NA                          | NA                  |
| <i>HLA-X</i>                          | 6          | 31424623       | 10644  | 1     | $1.55 \times 10^{-6}$  | NA                                                        | <i>HLA-X</i>     | NA                    | NA                          | NA                  |
| <i>HCG4P4</i>                         | 6          | 29917982       | 10428  | 1     | $8.60 \times 10^{-6}$  | NA                                                        | <i>HCG4P4</i>    | $6.98 \times 10^{-4}$ | NA                          | NA                  |

**Supplementary Table 1.** Results of gene-based and differential expression analyses of 58 MS-associated genes (continued)

| Gene                          | Chromosome | Start position | Length | #SNP* | Initial $p$           | Genes significant in initial study based on SNP-based $p$ | Genes in PheGen | Replication $p$       | Differential expression $p$ | Sample† |
|-------------------------------|------------|----------------|--------|-------|-----------------------|-----------------------------------------------------------|-----------------|-----------------------|-----------------------------|---------|
| RPL3P2                        | 6          | 31243108       | 11240  | 2     | $1.66 \times 10^{-5}$ | NA                                                        | RPL3P2          | NA                    | NA                          | NA      |
| HLA-C                         | 6          | 31231529       | 13326  | 2     | $1.72 \times 10^{-5}$ | NA                                                        | HLA-C           | $4.29 \times 10^{-2}$ | $6.15 \times 10^{-3}$       | S1      |
|                               |            |                |        |       |                       |                                                           |                 |                       | $2.74 \times 10^{-2}$       | S2      |
| DHFRP2                        | 6          | 31326244       | 13498  | 2     | $2.89 \times 10^{-5}$ | NA                                                        | DHFRP2          | NA                    | NA                          | NA      |
| MICE                          | 6          | 29704234       | 17646  | 1     | $4.63 \times 10^{-5}$ | NA                                                        | MICE            | NA                    | NA                          | NA      |
| TRIM31                        | 6          | 30065674       | 20193  | 1     | $1.18 \times 10^{-4}$ | NA                                                        | TRIM31          | $1.31 \times 10^{-4}$ | NS                          | NS      |
| MOG                           | 6          | 29619758       | 25391  | 2     | $1.21 \times 10^{-5}$ | NA                                                        | NA              | $5.09 \times 10^{-4}$ | $2.12 \times 10^{-2}$       | S1      |
|                               |            |                |        |       |                       |                                                           |                 |                       | $3.65 \times 10^{-2}$       | S3      |
|                               |            |                |        |       |                       |                                                           |                 |                       | $2.92 \times 10^{-2}$       | S4      |
| HLA-DMA                       | 6          | 32911391       | 14508  | 2     | $3.15 \times 10^{-7}$ | NA                                                        | NA              | $4.08 \times 10^{-2}$ | $8.62 \times 10^{-4}$       | S1      |
| CCHCR1                        | 6          | 31105216       | 25799  | 2     | $4.03 \times 10^{-5}$ | NA                                                        | NA              | $1.08 \times 10^{-3}$ | $1.05 \times 10^{-2}$       | S1      |
| HCG22                         | 6          | 31016984       | 15669  | 6     | $1.21 \times 10^{-4}$ | NA                                                        | NA              | $2.29 \times 10^{-2}$ | $3.85 \times 10^{-2}$       | S1      |
| BRD2                          | 6          | 32931437       | 22845  | 1     | $1.07 \times 10^{-5}$ | NA                                                        | NA              | NS                    | $5.65 \times 10^{-6}$       | S1      |
| FAM69A                        | 1          | 93302721       | 129358 | 11    | $4.47 \times 10^{-5}$ | NA                                                        | NA              | NA                    | $1.63 \times 10^{-2}$       | S1      |
| LOC100294145                  | 6          | 32856953       | 19582  | 3     | $2.27 \times 10^{-5}$ | NA                                                        | NA              | NA                    | $4.21 \times 10^{-2}$       | S2      |
| POU2F3                        | 11         | 12000000       | 89702  | 3     | $1.13 \times 10^{-4}$ | NA                                                        | NA              | NS                    | $8.41 \times 10^{-3}$       | S3      |
| TRIM26P                       | 6          | 30201078       | 13978  | 2     | $3.72 \times 10^{-5}$ | NA                                                        | NA              | $7.80 \times 10^{-6}$ | NA                          | NA      |
| HCP5P14                       | 6          | 29733324       | 12339  | 1     | $1.33 \times 10^{-4}$ | NA                                                        | NA              | $9.94 \times 10^{-5}$ | NA                          | NA      |
| 3.8-1.4(HLA complex group 26) | 6          | 29828692       | 11172  | 7     | $1.58 \times 10^{-5}$ | NA                                                        | NA              | $1.08 \times 10^{-3}$ | NA                          | NA      |
| C6orf15                       | 6          | 31074000       | 11332  | 3     | $9.26 \times 10^{-5}$ | NA                                                        | NA              | $2.22 \times 10^{-3}$ | NS                          | NS      |
| MUC21                         | 6          | 30946485       | 16190  | 4     | $4.40 \times 10^{-5}$ | NA                                                        | NA              | $3.42 \times 10^{-3}$ | NA                          | NA      |
| HLA-A                         | 6          | 29905309       | 13352  | 4     | $1.61 \times 10^{-5}$ | NA                                                        | NA              | $8.38 \times 10^{-3}$ | NS                          | NS      |
| HLA-F-AS1                     | 6          | 29689378       | 32448  | 7     | $1.83 \times 10^{-6}$ | NA                                                        | NA              | $2.52 \times 10^{-2}$ | NA                          | NA      |
| MXD3                          | 5          | 17700000       | 16791  | 2     | $7.60 \times 10^{-7}$ | NA                                                        | NA              | NS                    | NS                          | NS      |
| LOC100287247                  | 22         | -              | -      | 1     | $2.71 \times 10^{-5}$ | NA                                                        | NA              | NA                    | NA                          | NA      |
| LOC100127934                  | 1          | 93392136       | 10509  | 1     | $6.18 \times 10^{-5}$ | NA                                                        | NA              | NA                    | NA                          | NA      |
| RPL15P4                       | 6          | 31490853       | 10645  | 1     | $2.08 \times 10^{-7}$ | NA                                                        | NA              | NA                    | NA                          | NA      |
| HCG2P8                        | 6          | 29767896       | 13543  | 1     | $3.96 \times 10^{-5}$ | NA                                                        | NA              | NA                    | NA                          | NA      |

PheGenI, Phenotype-Genotype Integrator.

\*The number of SNP included in a gene with  $p$ -value < 0.05, †Ms-related cells sample used to differential expression analysis. S1: PBMC, S2: CD34+ HPC, S3: CD8+ T lymphocytes, S4, spinal cord. The genes listed here that are not defined in the main text are chromosome 6 open reading frame 10 (C6orf10), notch 4 (NOTCH4), small nucleolar RNA, H/ACA box 38 (SNORA38), proline-rich coiled-coil 2A (BAT2), BCL2-associated athanogene 6 (BAT3), peptidylprolyl isomerase A pseudogene 9 (PPIAP9), major histocompatibility complex, class II, DQ beta 2 (HLA-DQB2), major histocompatibility complex, class II, DQ alpha 2 (HLA-DQA2), ubiquitin specific peptidase 8 pseudogene 1 (LOC100287272), mitochondrial coiled-coil domain 1 (MCCD1), fibroblast growth factor receptor 3 pseudogene 1 (LOC100462812), HLA complex group 27 (HCG27), major histocompatibility complex, class II, DR beta 9 (HLA-DRB9), major histocompatibility complex, class I, S (HLA-S), butyrophilin-like 2 (BTML2), DEAH (Asp-Glu-Ala-His) box polypeptide 16 (DHX16) transcription factor 19 (TCF19), HLA complex group 26 pseudogene (3.8-1.5), MHC class I polypeptide-related sequence A (LOC100507436), major histocompatibility complex, class I x (HLA-X), HLA complex group 4 pseudogene 4 (HCG4P4), ribosomal protein L3 pseudogene 2 (RPL3P2), dihydrofolate reductase pseudogene 2 (DHFRP2), MHC class I polypeptide-related sequence E (MICE), ripartite motif containing 31 (TRIM31), MAX dimerization protein 3 (MXD3), similar to hCG1987428 (LOC100287247), meiotic nuclear divisions 1 homolog (LOC100127934), ribosomal protein L15 pseudogene 4 (RPL15P4), HLA complex group 2 pseudogene 8 (HCG2P8) respectively.
