# Supplementary material for: Susceptibility Genes for Multiple Sclerosis Identified in a Gene-Based Genome-Wide Association Study
Source: PubMed Central journal article supplement — J Clin Neurol. 2015 Aug 21;11(4):311–8. doi: 10.3988/jcn.2015.11.4.311 (PMC4596110; doi:10.3988/jcn.2015.11.4.311), 2015-08-21
Supplement: jcn-11-311-s002.pdf [file jcn-11-311-s002.pdf]

**Supplementary Table 2.** Enrichment of GO terms and KEGG pathways of the 58 MS-associated genes

| Category        | Term                                                                                                 | Count | %     | Genes                                                                    | List total | Relative enrichment | Bonferroni*            |
|-----------------|------------------------------------------------------------------------------------------------------|-------|-------|--------------------------------------------------------------------------|------------|---------------------|------------------------|
| GOTERM_BP_FAT   | GO:0019882~antigen processing and presentation                                                       | 12    | 21.43 | 3112, 285830, 3117, 3118, 6891, 3107, 3109, 3108, 3134, 3105, 3132, 3122 | 25         | 78.23               | $1.09 \times 10^{-16}$ |
| GOTERM_CC_FAT   | GO:0042611~MHC protein complex                                                                       | 11    | 19.64 | 3112, 285830, 3117, 3118, 3107, 3109, 3108, 3134, 3105, 3132, 3122       | 24         | 102.78              | $1.06 \times 10^{-16}$ |
| SP_PIR_KEYWORDS | mhc ii                                                                                               | 9     | 16.07 | 3112, 3117, 3118, 3107, 3109, 3108, 3105, 3132, 3122                     | 34         | 164.25              | $1.84 \times 10^{-14}$ |
| UP_SEQ_FEATURE  | Region of interest:Connecting peptide                                                                | 9     | 16.07 | 3112, 3117, 3118, 3107, 3109, 3108, 3134, 3105, 3122                     | 33         | 137.17              | $3.39 \times 10^{-13}$ |
| UP_SEQ_FEATURE  | Domain:Ig-like C1-type                                                                               | 9     | 16.07 | 3112, 3117, 3118, 3107, 3109, 3108, 3134, 3105, 3122                     | 33         | 130.32              | $5.42 \times 10^{-13}$ |
| KEGG_PATHWAY    | hsa05330:Allograft rejection                                                                         | 9     | 16.07 | 3112, 3117, 3118, 3107, 3109, 3108, 3134, 3105, 3122                     | 14         | 90.80               | $7.23 \times 10^{-14}$ |
| KEGG_PATHWAY    | hsa05332:Graft-versus-host disease                                                                   | 9     | 16.07 | 3112, 3117, 3118, 3107, 3109, 3108, 3134, 3105, 3122                     | 14         | 83.82               | $1.47 \times 10^{-13}$ |
| KEGG_PATHWAY    | hsa04940:Type I diabetes mellitus                                                                    | 9     | 16.07 | 3112, 3117, 3118, 3107, 3109, 3108, 3134, 3105, 3122                     | 14         | 77.83               | $2.80 \times 10^{-13}$ |
| KEGG_PATHWAY    | hsa04612:Antigen processing and presentation                                                         | 10    | 17.86 | 3112, 3117, 3118, 6891, 3107, 3109, 3108, 3134, 3105, 3122               | 14         | 43.76               | $7.53 \times 10^{-13}$ |
| KEGG_PATHWAY    | hsa05320:Autoimmune thyroid disease                                                                  | 9     | 16.07 | 3112, 3117, 3118, 3107, 3109, 3108, 3134, 3105, 3122                     | 14         | 64.10               | $1.50 \times 10^{-12}$ |
| INTERPRO        | IPR003597:Immunoglobulin C1-set                                                                      | 9     | 16.07 | 3112, 3117, 3118, 3107, 3109, 3108, 3134, 3105, 3122                     | 29         | 76.03               | $1.16 \times 10^{-11}$ |
| UP_SEQ_FEATURE  | Region of interest:Alpha-1                                                                           | 7     | 12.50 | 3117, 3118, 3107, 3108, 3134, 3105, 3122                                 | 33         | 202.71              | $1.56 \times 10^{-10}$ |
| UP_SEQ_FEATURE  | Region of interest:Alpha-2                                                                           | 7     | 12.50 | 3117, 3118, 3107, 3108, 3134, 3105, 3122                                 | 33         | 202.71              | $1.56 \times 10^{-10}$ |
| INTERPRO        | IPR014745:MHC class II, alpha/beta chain, N-terminal                                                 | 7     | 12.50 | 3112, 3117, 3118, 3109, 3108, 3132, 3122                                 | 29         | 182.78              | $7.35 \times 10^{-11}$ |
| INTERPRO        | IPR003006:Immunoglobulin/major histocompatibility complex, conserved site                            | 9     | 16.07 | 3112, 3117, 3118, 3107, 3109, 3108, 3134, 3105, 3122                     | 29         | 59.43               | $8.98 \times 10^{-11}$ |
| KEGG_PATHWAY    | hsa05416:Viral myocarditis                                                                           | 9     | 16.07 | 3112, 3117, 3118, 3107, 3109, 3108, 3134, 3105, 3122                     | 14         | 46.04               | $2.47 \times 10^{-11}$ |
| SMART           | SM00407:IGc1                                                                                         | 9     | 16.07 | 3112, 3117, 3118, 3107, 3109, 3108, 3134, 3105, 3122                     | 24         | 50.07               | $7.27 \times 10^{-11}$ |
| GOTERM_CC_FAT   | GO:0042613~MHC class II protein complex                                                              | 7     | 12.50 | 3112, 3117, 3118, 3109, 3108, 3132, 3122                                 | 24         | 128.55              | $5.56 \times 10^{-10}$ |
| GOTERM_BP_FAT   | GO:0002504~antigen processing and presentation of peptide or polysaccharide antigen via MHC class II | 7     | 12.50 | 3112, 3117, 3118, 3109, 3108, 3132, 3122                                 | 25         | 114.78              | $3.42 \times 10^{-9}$  |
| GOTERM_MF_FAT   | GO:0032395~MHC class II receptor activity                                                            | 6     | 10.71 | 3112, 3117, 3118, 3107, 3108, 3122                                       | 23         | 178.26              | $7.85 \times 10^{-9}$  |
| SP_PIR_KEYWORDS | Immune response                                                                                      | 10    | 17.86 | 3112, 3117, 3118, 6891, 3107, 3109, 3108, 3134, 3105, 3122               | 34         | 25.26               | $8.42 \times 10^{-9}$  |
| KEGG_PATHWAY    | hsa04514:Cell adhesion molecules (CAMs)                                                              | 9     | 16.07 | 3112, 3117, 3118, 3107, 3109, 3108, 3134, 3105, 3122                     | 14         | 24.76               | $4.04 \times 10^{-9}$  |
| GOTERM_CC_FAT   | GO:0042825~TAP complex                                                                               | 5     | 8.93  | 3112, 6891, 3109, 3108, 3122                                             | 24         | 380.42              | $2.00 \times 10^{-8}$  |
| GOTERM_CC_FAT   | GO:0042824~MHC class I peptide loading complex                                                       | 5     | 8.93  | 3112, 6891, 3109, 3108, 3122                                             | 24         | 295.88              | $7.18 \times 10^{-8}$  |
| GOTERM_BP_FAT   | GO:0048002~antigen processing and presentation of peptide antigen                                    | 6     | 10.71 | 6891, 3107, 3108, 3134, 3105, 3122                                       | 25         | 115.95              | $2.17 \times 10^{-7}$  |
| PIR_SUPERFAMILY | PIRSF001991:Class II histocompatibility antigen                                                      | 6     | 10.71 | 3112, 3117, 3118, 3109, 3108, 3122                                       | 18         | 94.82               | $2.79 \times 10^{-8}$  |
| INTERPRO        | IPR007110:Immunoglobulin-like                                                                        | 11    | 19.64 | 3112, 3117, 3118, 4340, 3107, 3109, 3108, 3134, 56244, 3105, 3122        | 29         | 12.61               | $3.53 \times 10^{-7}$  |
| KEGG_PATHWAY    | hsa05310:Asthma                                                                                      | 6     | 10.71 | 3112, 3117, 3118, 3109, 3108, 3122                                       | 14         | 75.15               | $1.10 \times 10^{-7}$  |
| GOTERM_BP_FAT   | GO:0006955~immune response                                                                           | 12    | 21.43 | 3112, 285830, 3117, 3118, 6891, 3107, 3109, 3108, 3134, 3105, 3132, 3122 | 25         | 9.41                | $1.53 \times 10^{-6}$  |
| GOTERM_MF_FAT   | GO:0042288~MHC class I protein binding                                                               | 5     | 8.93  | 3112, 6891, 3109, 3108, 3122                                             | 23         | 176.40              | $8.88 \times 10^{-7}$  |
| INTERPRO        | IPR013783:Immunoglobulin-like fold                                                                   | 11    | 19.64 | 3112, 3117, 3118, 4340, 3107, 3109, 3108, 3134, 56244, 3105, 3122        | 29         | 11.43               | $9.06 \times 10^{-7}$  |

**Supplementary Table 2.** Enrichment of GO terms and KEGG pathways of the 58 MS-associated genes (continued)

| Category        | Term                                                                              | Count | %     | Genes                                                                                                                                                                                                 | List total | Relative enrichment | Bonferroni*           |
|-----------------|-----------------------------------------------------------------------------------|-------|-------|-------------------------------------------------------------------------------------------------------------------------------------------------------------------------------------------------------|------------|---------------------|-----------------------|
| GOTERM_MF_FAT   | GO:0042287~MHC protein binding                                                    | 5     | 8.93  | 3112, 6891, 3109, 3108, 3122                                                                                                                                                                          | 23         | 112.90              | $6.11 \times 10^{-6}$ |
| KEGG_PATHWAY    | hsa04672:Intestinal immune network for IgA production                             | 6     | 10.71 | 3112, 3117, 3118, 3109, 3108, 3122                                                                                                                                                                    | 14         | 44.48               | $1.72 \times 10^{-6}$ |
| SP_PIR_KEYWORDS | Heterodimer                                                                       | 6     | 10.71 | 3117, 3118, 3107, 3134, 3105, 3122                                                                                                                                                                    | 34         | 32.96               | $6.98 \times 10^{-5}$ |
| SP_PIR_KEYWORDS | Transmembrane protein                                                             | 10    | 17.86 | 3112, 3117, 3118, 4340, 6891, 3107, 3108, 3134, 3105, 3122                                                                                                                                            | 34         | 8.81                | $7.59 \times 10^{-5}$ |
| INTERPRO        | IPR001003:MHC class II, alpha chain, N-terminal                                   | 4     | 7.14  | 3117, 3118, 3108, 3122                                                                                                                                                                                | 29         | 191.48              | $7.32 \times 10^{-5}$ |
| KEGG_PATHWAY    | hsa05322:Systemic lupus erythematosus                                             | 6     | 10.71 | 3112, 3117, 3118, 3109, 3108, 3122                                                                                                                                                                    | 14         | 22.01               | $6.04 \times 10^{-5}$ |
| GOTERM_BP_FAT   | GO:0002474~antigen processing and presentation of peptide antigen via MHC class I | 4     | 7.14  | 6891, 3107, 3134, 3105                                                                                                                                                                                | 25         | 127.32              | $6.60 \times 10^{-4}$ |
| GOTERM_CC_FAT   | GO:0044459~plasma membrane part                                                   | 15    | 26.79 | 4855, 3112, 3117, 3118, 6891, 394263, 285830, 199, 3107, 3109, 3108, 3134, 3105, 3132, 3122                                                                                                           | 24         | 3.63                | $2.43 \times 10^{-4}$ |
| INTERPRO        | IPR001039:MHC class I, alpha chain, alpha1, and alpha2                            | 4     | 7.14  | 285830, 3107, 3134, 3105                                                                                                                                                                              | 29         | 85.10               | $9.56 \times 10^{-4}$ |
| INTERPRO        | IPR011161:MHC class I-like antigen recognition                                    | 4     | 7.14  | 285830, 3107, 3134, 3105                                                                                                                                                                              | 29         | 82.06               | $1.07 \times 10^{-3}$ |
| GOTERM_CC_FAT   | GO:0042612~MHC class I protein complex                                            | 4     | 7.14  | 285830, 3107, 3134, 3105                                                                                                                                                                              | 24         | 76.08               | $1.17 \times 10^{-3}$ |
| BIOCARTA        | h_mhcPathway:Antigen processing and presentation                                  | 3     | 5.36  | 6891, 3105, 3122                                                                                                                                                                                      | 3          | 143.70              | $5.67 \times 10^{-4}$ |
| UP_SEQ_FEATURE  | Sequence variant                                                                  | 31    | 55.36 | 170679, 3112, 4855, 11074, 54535, 6891, 56244, 7148, 10919, 6941, 199, 6046, 83463, 5460, 3107, 3109, 3108, 3134, 3105, 401250, 3117, 3118, 4340, 29113, 8449, 10665, 7916, 394263, 25833, 3122, 7917 | 33         | 1.50                | $1.94 \times 10^{-2}$ |
| SP_PIR_KEYWORDS | Polymorphism                                                                      | 31    | 55.36 | 170679, 3112, 4855, 11074, 54535, 6891, 56244, 7148, 10919, 6941, 199, 6046, 83463, 5460, 3107, 3109, 3108, 3134, 3105, 401250, 3117, 3118, 4340, 29113, 8449, 10665, 7916, 394263, 25833, 3122, 7917 | 34         | 1.52                | $7.47 \times 10^{-3}$ |
| UP_SEQ_FEATURE  | Region of interest:Alpha-3                                                        | 3     | 5.36  | 3107, 3134, 3105                                                                                                                                                                                      | 33         | 193.06              | $2.92 \times 10^{-2}$ |
| SP_PIR_KEYWORDS | mhc i                                                                             | 3     | 5.36  | 3107, 3134, 3105                                                                                                                                                                                      | 34         | 169.72              | $1.05 \times 10^{-2}$ |
| GOTERM_BP_FAT   | GO:0002478~antigen processing and presentation of exogenous peptide antigen       | 3     | 5.36  | 6891, 3108, 3122                                                                                                                                                                                      | 25         | 147.58              | $3.25 \times 10^{-2}$ |
| PIR_SUPERFAMILY | PIRSF001990:Class I histocompatibility antigen                                    | 3     | 5.36  | 3107, 3134, 3105                                                                                                                                                                                      | 18         | 136.96              | $2.30 \times 10^{-3}$ |
| GOTERM_BP_FAT   | GO:0019884~antigen processing and presentation of exogenous antigen               | 3     | 5.36  | 6891, 3108, 3122                                                                                                                                                                                      | 25         | 115.95              | $5.30 \times 10^{-2}$ |
| GOTERM_MF_FAT   | GO:0042277~peptide binding                                                        | 5     | 8.93  | 3112, 6891, 3109, 3108, 3122                                                                                                                                                                          | 23         | 13.90               | $2.69 \times 10^{-2}$ |
| INTERPRO        | IPR000353:MHC class II, beta chain, N-terminal                                    | 3     | 5.36  | 3112, 3109, 3132                                                                                                                                                                                      | 29         | 101.37              | $2.84 \times 10^{-2}$ |
| GOTERM_MF_FAT   | GO:0032393~MHC class I receptor activity                                          | 3     | 5.36  | 3107, 3134, 3105                                                                                                                                                                                      | 23         | 99.61               | $2.89 \times 10^{-2}$ |
| GOTERM_CC_FAT   | GO:0005886~plasma membrane                                                        | 16    | 28.57 | 4855, 3112, 3117, 3118, 4340, 6891, 394263, 285830, 199, 3107, 3109, 3108, 3134, 3105, 3132, 3122                                                                                                     | 24         | 2.26                | $2.98 \times 10^{-2}$ |

Count, the number of genes enriched in particular GO terms or KEGG pathways; Genes, potential genes enriched in particular GO terms or KEGG pathways.

\*p value with Bonferroni correction for multiple tests. Only significant results with  $p < 0.05$  are listed.

GO: Gene Ontology, KEGG: Kyoto Encyclopedia of Genes and Genomes, MHC: major histocompatibility complex, MS: multiple sclerosis.
